# Supplementary material for: Risk Factors Associated With SARS-CoV-2 Seropositivity Among US Health Care Personnel
Source: PubMed Central journal article supplement (PMC7948059; doi:10.1001/jamanetworkopen.2021.1283), 2021-03-10
Supplement: jamanetwopen-e211283-s001.pdf [file jamanetwopen-e211283-s001.pdf]

## Supplemental Online Content

Jacob JT, Baker JM, Fridkin SK, et al. Risk factors associated with SARS-CoV-2 seropositivity among US health care personnel. *JAMA Netw Open*. 2021;4(3):e211283. doi:10.1001/jamanetworkopen.2021.1283

**eTable 1.** Mapping of 3 Metadata Variables From Site-Specific Surveys From 4 Health Care Systems

**eFigure 1.** Mean and Range for Cumulative Incidence of COVID-19 per 10 000 Among Study Participants Until 1 Week Prior to Serology Testing

**eTable 2.** Results of Logistic Regression Analyses Excluding Data from Emory, With SARS-CoV-2 Serology as the Outcome Variable

**eTable 3.** Results of Logistic Regression Analyses Including a Time Component (Month) in the Model, With SARS-CoV-2 Serology as the Outcome Variable

**eTable 4.** Results of Logistic Regression Analyses Excluding the Random Intercept Component, With SARS-CoV-2 Serology as the Outcome Variable

**eTable 5.** Infection Prevention Practices for Health Care Personnel (HCP) at the 4 Participating Health Care Systems Before (Cells Shaded Yellow) and During or After (Cells Shaded Blue) the Start of Seroprevalence Testing in HCP at That Site

This supplemental material has been provided by the authors to give readers additional information about their work.

**eTable 1. Mapping of 3 Metadata Variables From Site-Specific Surveys From 4 Health Care Systems**

| Metadata Variable                 | Site                   | Site-Specific Survey Question                                                                                                                                                                                                                                                                                                             | Site-Specific Survey Response Options                                                                                                                                                                                                                                                                                                                                                                                                                                                                                                                                                                                                                                                                                                                                      | Metadata Variable Categorization from Site-Specific Survey Response Options                                                  |
|-----------------------------------|------------------------|-------------------------------------------------------------------------------------------------------------------------------------------------------------------------------------------------------------------------------------------------------------------------------------------------------------------------------------------|----------------------------------------------------------------------------------------------------------------------------------------------------------------------------------------------------------------------------------------------------------------------------------------------------------------------------------------------------------------------------------------------------------------------------------------------------------------------------------------------------------------------------------------------------------------------------------------------------------------------------------------------------------------------------------------------------------------------------------------------------------------------------|------------------------------------------------------------------------------------------------------------------------------|
| COVID-19 positive patient contact | Emory                  | <p>A) Where do/did you spend the most time at work in the hospital during the COVID-19 pandemic? (may check more than one box if you split your time equally)</p> <p>B) While at work, did/do you provide direct patient care for any patients known (confirmed) to be positive for COVID-19, regardless of location in the facility?</p> | <p>A) Check boxes 13 options (all that apply):</p> <ol style="list-style-type: none"> <li>1. Med/surg- focused on COVID patients</li> <li>2. Med/surg -not focused on COVID patients</li> <li>3. ICU- focused on COVID patients</li> <li>4. ICU- not focused on COVID patients</li> <li>5. OR/peri-op</li> <li>6. Other procedure area</li> <li>7. ED</li> <li>8. Other hospital area</li> <li>9. Clinic- focused on COVID patients</li> <li>10. Clinic- not focused on COVID patients</li> <li>11. Non-clinical area of hospital/clinic</li> <li>12. Not in hospital/clinic</li> <li>13. Work from home</li> </ol> <p>B) Option buttons (mutually exclusive categories):</p> <ol style="list-style-type: none"> <li>1. Yes</li> <li>2. No</li> <li>3. Not sure</li> </ol> | <p>Any contact: A1, A3, A7, A9 and/or B1</p> <p>No contact: A2, A4-6, A8, A10-13 and B2</p> <p>Unknown: A missing and B3</p> |
|                                   | Johns Hopkins          | Have you worked in any of the following locations since February 1, 2020? (Select all that apply)                                                                                                                                                                                                                                         | <p>Check boxes 4 options</p> <ol style="list-style-type: none"> <li>1. Biomode [negative pressure] unit with COVID patients</li> <li>2. Non-biomode unit with COVID patients</li> <li>3. ED</li> <li>4. I have not worked in any of these locations</li> </ol>                                                                                                                                                                                                                                                                                                                                                                                                                                                                                                             | <p>Any contact: 1-3</p> <p>No contact: 4</p> <p>Unknown: N/A</p>                                                             |
|                                   | Rush                   | Estimate the total number of COVID-19 positive patients you have cared for                                                                                                                                                                                                                                                                | Free text                                                                                                                                                                                                                                                                                                                                                                                                                                                                                                                                                                                                                                                                                                                                                                  | <p>Any contact: Free text &gt; 0</p> <p>No contact: "None" or similar</p> <p>Unknown: "Unknown" or similar</p>               |
|                                   | University of Maryland | At work, how many patients with COVID-19 have you had direct contact with?                                                                                                                                                                                                                                                                | <ol style="list-style-type: none"> <li>1. No patient contact</li> <li>2. 1-10</li> <li>3. 11-20</li> <li>4. More than 20</li> </ol>                                                                                                                                                                                                                                                                                                                                                                                                                                                                                                                                                                                                                                        | <p>Any contact: 2-4</p> <p>No contact: 1</p> <p>Unknown: N/A</p>                                                             |

**eTable 1. Mapping of 3 Metadata Variables From Site-Specific Surveys From 4 Health Care Systems (continued)**

| Metadata Variable                                  | Site                   | Site-Specific Survey Question                                                                                                                  | Site-Specific Survey Response Options                                                                                                                       | Metadata Variable Categorization from Site-Specific Survey Response Options  |
|----------------------------------------------------|------------------------|------------------------------------------------------------------------------------------------------------------------------------------------|-------------------------------------------------------------------------------------------------------------------------------------------------------------|------------------------------------------------------------------------------|
| Contact with COVID-19 positive person in community | Emory                  | Since March 1, 2020, did you have close contact (> 10 minutes face to face) with someone with suspected or confirmed COVID-19 outside of work? | 1. Yes exposed to someone with COVID-19<br>2. Yes<br>3. No<br>4. Not sure                                                                                   | Yes: 1, 2<br>No: 3<br>Unknown: 4                                             |
|                                                    | Johns Hopkins          | While not wearing a mask, have you been exposed to (select all that apply):                                                                    | 1. COVID positive household contact<br>2. COVID positive non-work friend<br>3. COVID positive patient<br>4. COVID positive hospital staff member<br>5. None | Yes: 1, 2<br>No: 3-5<br>Unknown: N/A                                         |
|                                                    | Rush                   | How many COVID-19 proven or suspected individuals have you had close contact with outside of your workplace?                                   | Free text                                                                                                                                                   | Yes: Free text > 0<br>No: "None" or similar<br>Unknown: "Unknown" or similar |
|                                                    | University of Maryland | Have you had any close contact outside of work with someone who tested positive for COVID-19?                                                  | 1. Yes<br>2. No                                                                                                                                             | Yes: 1<br>No: 2<br>Unknown: N/A                                              |

**eTable 1. Mapping of 3 Metadata Variables From Site-Specific Surveys From 4 Health Care Systems (continued)**

| Metadata Variable | Site          | Site-Specific Survey Question                                                                                                                           | Site-Specific Survey Response Options                                                                                                                                                                                                                                                                                                                                                                                                                                                                                                                           | Metadata Variable Categorization from Site-Specific Survey Response Options                                                                                                                                                                                                       |
|-------------------|---------------|---------------------------------------------------------------------------------------------------------------------------------------------------------|-----------------------------------------------------------------------------------------------------------------------------------------------------------------------------------------------------------------------------------------------------------------------------------------------------------------------------------------------------------------------------------------------------------------------------------------------------------------------------------------------------------------------------------------------------------------|-----------------------------------------------------------------------------------------------------------------------------------------------------------------------------------------------------------------------------------------------------------------------------------|
| Work environment  | Emory         | Where do/did you spend the most time at work in the hospital during the COVID-19 pandemic? (may check more than one box if you split your time equally) | <ol style="list-style-type: none"> <li>1. Med/surg- focused on COVID patients</li> <li>2. Med/surg-not focused on COVID patients</li> <li>3. ICU- focused on COVID patients</li> <li>4. ICU- not focused on COVID patients</li> <li>5. OR/peri-op</li> <li>6. Other procedure area</li> <li>7. ED</li> <li>8. Other hospital area</li> <li>9. Clinic- focused on COVID patients</li> <li>10. Clinic- not focused on COVID patients</li> <li>11. Non-clinical area of hospital/clinic</li> <li>12. Not in hospital/clinic</li> <li>13. Work from home</li> </ol> | <p>Assigned to one location based on the following hierarchy: ED/emergency, inpatient, other, unknown</p> <p>ED/emergency: 7<br/>                     Inpatient (COVID-19/non-COVID-19): 1-4<br/>                     Other: 5, 6, 8-13<br/>                     Unknown: N/A</p> |
|                   | Johns Hopkins | Have you worked in any of the following locations since February 1, 2020? (Select all that apply)                                                       | <ol style="list-style-type: none"> <li>1. Biomode [negative pressure] unit with COVID patients</li> <li>2. Non-biomode unit with COVID patients</li> <li>3. ED</li> <li>4. I have not worked in any of these locations</li> </ol>                                                                                                                                                                                                                                                                                                                               | <p>Assigned to one location based on the following hierarchy: ED/emergency, inpatient, other, unknown</p> <p>ED/emergency: 3<br/>                     Inpatient (COVID-19/non-COVID-19): 1, 2<br/>                     Other: N/A<br/>                     Unknown: 4</p>         |
|                   | Rush          | Please identify the COVID-19 units in which you worked:                                                                                                 | <ol style="list-style-type: none"> <li>1. ED</li> <li>2. ward</li> <li>3. ICU</li> <li>4. COVID-19 testing clinic</li> <li>5. other (free text)</li> </ol>                                                                                                                                                                                                                                                                                                                                                                                                      | <p>Assigned to one location based on the following hierarchy: ED/emergency, inpatient, other, unknown</p> <p>ED/emergency: 1<br/>                     Inpatient (COVID-19/non-COVID-19): 2, 3<br/>                     Other: 4<br/>                     Unknown: 5</p>           |

**eTable 1. Mapping of 3 Metadata Variables From Site-Specific Surveys From 4 Health Care Systems (continued)**

| Metadata Variable | Site                   | Site-Specific Survey Question                              | Site-Specific Survey Response Options                                                                                                                                                                                                                                                                                                                                                                                                                                           | Metadata Variable Categorization from Site-Specific Survey Response Options                                                                                                                                                                                                         |
|-------------------|------------------------|------------------------------------------------------------|---------------------------------------------------------------------------------------------------------------------------------------------------------------------------------------------------------------------------------------------------------------------------------------------------------------------------------------------------------------------------------------------------------------------------------------------------------------------------------|-------------------------------------------------------------------------------------------------------------------------------------------------------------------------------------------------------------------------------------------------------------------------------------|
| Work environment  | University of Maryland | In which department type do you currently most often work? | <ol style="list-style-type: none"> <li>1. BCU</li> <li>2. ICU</li> <li>3. IMC</li> <li>4. Med/Surg Acute</li> <li>5. Administrative Offices (outside hospital)</li> <li>6. Support Offices (within hospital)</li> <li>7. Pediatric</li> <li>8. Behavioral Health</li> <li>9. Ambulatory</li> <li>10. Periop/Surgical</li> <li>11. Emergency</li> <li>12. Rehab/Post Acute</li> <li>13. Trauma</li> <li>14. Clinical Research</li> <li>15. EVS</li> <li>16. Transport</li> </ol> | <p>Assigned to one location based on the following hierarchy: ED/emergency, inpatient, other, unknown</p> <p>ED/emergency: 11<br/>                     Inpatient (COVID-19/non-COVID-19): 1-4<br/>                     Other: 5-10, 12-16<br/>                     Unknown: N/A</p> |

ICU=intensive care unit; OR=operating room; ED=emergency department; BCU=biocontainment unit; IMC=intermediate care unit; EVS=environmental services; N/A=not applicable

**eFigure 1. Mean and Range for Cumulative Incidence of COVID-19 per 10 000 Among Study Participants Until 1 Week Prior to Serology Testing**

For a given week in the figure, the mean represents the average COVID-19 cumulative incidence values for the residential zip code among the healthcare personnel who obtained serology testing that week. Similarly, the minimum and maximum COVID-19 cumulative incidence for the residential zip code were calculated among healthcare personnel who obtained serology testing that week.

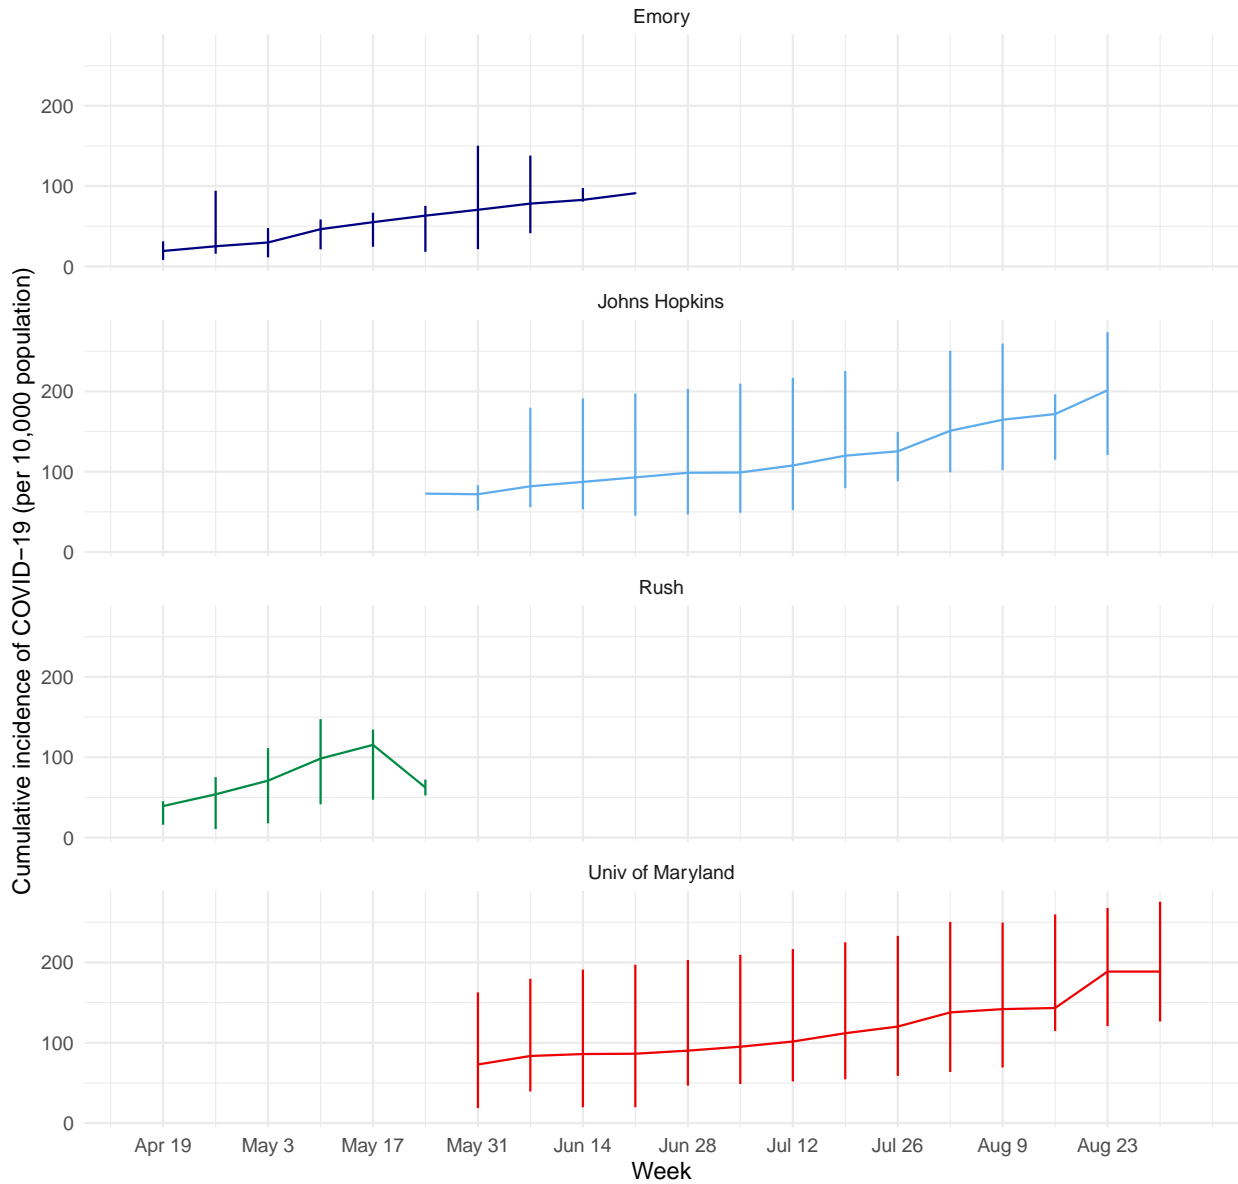

**eTable 2. Results of Logistic Regression Analyses Excluding Data from Emory, With SARS-CoV-2 Serology as the Outcome Variable**

| <b>Factor</b>                                                   | <b>Adjusted OR<sup>a</sup> (95% CI)</b> |
|-----------------------------------------------------------------|-----------------------------------------|
| Total participants                                              | 13,861                                  |
| <b>Demographic &amp; community factors</b>                      |                                         |
| <b>Sex</b>                                                      |                                         |
| Male                                                            | 1.0 (ref)                               |
| Female                                                          | 0.9 (0.7-1.2)                           |
| Other/unknown                                                   | 0.0 (NA)                                |
| <b>Age group</b>                                                |                                         |
| 60+                                                             | 1.0 (ref)                               |
| 50-59                                                           | 0.9 (0.6-1.3)                           |
| 40-49                                                           | 0.9 (0.6-1.3)                           |
| 30-39                                                           | 1.0 (0.7-1.4)                           |
| <30                                                             | 1.1 (0.8-1.7)                           |
| <b>Ethnicity</b>                                                |                                         |
| Not Hispanic/Latino                                             | 1.0 (ref)                               |
| Hispanic/Latino                                                 | 1.3 (0.9-2.0)                           |
| Unknown                                                         | 1.1 (0.7-1.8)                           |
| <b>Race</b>                                                     |                                         |
| White                                                           | 1.0 (ref)                               |
| American Indian/Alaska Native                                   | 1.2 (0.4-4.1)                           |
| Asian                                                           | 1.4 (1.0-1.9)                           |
| Black/African American                                          | 2.3 (1.8-2.9)                           |
| Multiracial                                                     | 0.8 (0.3-2.2)                           |
| Native Hawaiian/Other Pacific Islander                          | 2.1 (0.3-16.2)                          |
| Other                                                           | 1.2 (0.8-1.9)                           |
| Unknown                                                         | 1.2 (0.7-2.2)                           |
| <b>Contact with COVID-19 positive person in community</b>       |                                         |
| No                                                              | 1.0 (ref)                               |
| Yes                                                             | 5.9 (4.7-7.4)                           |
| Unknown                                                         | 0.0 (NA)                                |
| Cumulative incidence of COVID-19 (log 10) per 10,000 population | 2.7 (1.6-4.7)                           |

**eTable 2. Results of Logistic Regression Analyses Excluding Data from Emory, With SARS-CoV-2 Serology as the Outcome Variable (continued)**

| Factor                                                       | Adjusted OR <sup>a</sup> (95% CI) |
|--------------------------------------------------------------|-----------------------------------|
| <b>Workplace factors</b>                                     |                                   |
| Job role                                                     |                                   |
| Non-clinical                                                 | 1.0 (ref)                         |
| Advanced practice provider                                   | 0.5 (0.3-1.0)                     |
| Environmental services                                       | 1.7 (0.7-4.3)                     |
| Nurse                                                        | 1.2 (0.9-1.6)                     |
| Other direct care provider <sup>b</sup>                      | 1.2 (0.6-2.1)                     |
| Other provider <sup>c</sup>                                  | 0.7 (0.4-1.5)                     |
| Patient care technician, nursing assistant, nurse technician | 1.3 (0.9-1.9)                     |
| Pharmacy                                                     | 0.8 (0.4-1.7)                     |
| Physician                                                    | 0.8 (0.5-1.1)                     |
| Physical/Occupational/Speech therapist                       | 1.4 (0.8-2.4)                     |
| Radiology technician, x-ray, radiology                       | 0.4 (0.1-1.7)                     |
| Respiratory therapist                                        | 1.0 (0.5-2.1)                     |
| Workplace environment                                        |                                   |
| Inpatient (COVID-19/non-COVID-19)                            | 1.0 (ref)                         |
| Emergency department/emergency                               | 1.2 (0.8-1.6)                     |
| Other                                                        | 0.8 (0.7-1.1)                     |
| Unknown                                                      | 1.1 (0.5-2.3)                     |
| COVID-19 patient contact                                     |                                   |
| No contact                                                   | 1.0 (ref)                         |
| Any contact                                                  | 1.2 (0.9-1.5)                     |
| Unknown                                                      | 2.0 (0.7-5.5)                     |

<sup>a</sup> Odds ratio for the relationship between the specified factor and SARS-CoV-2 seropositivity using mixed effects logistic regression controlling for all other factors in the table and adjusting for correlation within each healthcare system (via inclusion of a random intercept)

<sup>b</sup> Other direct care provider = Dialysis technician, phlebotomist

<sup>c</sup> Other provider = Laboratory technician, student, medical technologist, other categories unable to refine

OR= odds ratio; CI = confidence interval; ref = reference group, NA = not applicable due to small sample size



**eTable 3. Results of Logistic Regression Analyses Including a Time Component (Month) in the Model, With SARS-CoV-2 Serology as the Outcome Variable**

| Factor                                                          | Adjusted OR <sup>a</sup> (95% CI) |
|-----------------------------------------------------------------|-----------------------------------|
| Total participants                                              | 23,548                            |
| <b>Demographic &amp; community factors</b>                      |                                   |
| Sex                                                             |                                   |
| Male                                                            | 1.0 (ref)                         |
| Female                                                          | 0.8 (0.7-1.0)                     |
| Other/unknown                                                   | 0.0 (0.0-NA)                      |
| Age group                                                       |                                   |
| 60+                                                             | 1.0 (ref)                         |
| 50-59                                                           | 0.9 (0.7-1.2)                     |
| 40-49                                                           | 1.0 (0.8-1.3)                     |
| 30-39                                                           | 1.1 (0.9-1.4)                     |
| <30                                                             | 1.3 (1.0-1.7)                     |
| Ethnicity                                                       |                                   |
| Not Hispanic/Latino                                             | 1.0 (ref)                         |
| Hispanic/Latino                                                 | 1.1 (0.8-1.5)                     |
| Unknown                                                         | 0.9 (0.6-1.4)                     |
| Race                                                            |                                   |
| White                                                           | 1.0 (ref)                         |
| American Indian/Alaska Native                                   | 1.4 (0.6-3.5)                     |
| Asian                                                           | 1.2 (1.0-1.5)                     |
| Black/African American                                          | 2.1 (1.8-2.4)                     |
| Multiracial                                                     | 1.3 (0.8-2.3)                     |
| Native Hawaiian/Other Pacific Islander                          | 0.8 (0.1-6.2)                     |
| Other                                                           | 1.3 (0.8-2.0)                     |
| Unknown                                                         | 1.8 (1.2-2.7)                     |
| Contact with COVID-19 positive person in community              |                                   |
| No                                                              | 1.0 (ref)                         |
| Yes                                                             | 3.5 (2.9-4.1)                     |
| Unknown                                                         | 1.3 (1.0-1.5)                     |
| Cumulative incidence of COVID-19 (log 10) per 10,000 population | 1.7 (1.1-2.8)                     |

**eTable 3. Results of Logistic Regression Analyses Including a Time Component (Month) in the Model, With SARS-CoV-2 Serology as the Outcome Variable (continued)**

| Factor                                                       | Adjusted OR <sup>a</sup> (95% CI) |
|--------------------------------------------------------------|-----------------------------------|
| <b>Workplace factors</b>                                     |                                   |
| Job role                                                     |                                   |
| Non-clinical                                                 | 1.0 (ref)                         |
| Advanced practice provider                                   | 0.9 (0.6-1.2)                     |
| Environmental services                                       | 1.5 (0.8-3.1)                     |
| Nurse                                                        | 1.1 (0.9-1.3)                     |
| Other direct care provider <sup>b</sup>                      | 1.1 (0.8-1.4)                     |
| Other provider <sup>c</sup>                                  | 0.7 (0.4-1.3)                     |
| Patient care technician, nursing assistant, nurse technician | 1.2 (0.9-1.6)                     |
| Pharmacy                                                     | 0.8 (0.4-1.6)                     |
| Physician                                                    | 0.9 (0.7-1.1)                     |
| Physical/Occupational/Speech therapist                       | 1.3 (0.7-2.1)                     |
| Radiology technician, x-ray, radiology                       | 1.0 (0.6-1.6)                     |
| Respiratory therapist                                        | 0.9 (0.5-1.6)                     |
| Unknown                                                      | 0.9 (0.4-1.8)                     |
| Workplace environment                                        |                                   |
| Inpatient (COVID-19/non-COVID-19)                            | 1.0 (ref)                         |
| Emergency department/emergency                               | 1.0 (0.8-1.3)                     |
| Other                                                        | 0.9 (0.7-1.0)                     |
| Unknown                                                      | 0.9 (0.7-1.2)                     |
| COVID-19 patient contact                                     |                                   |
| No contact                                                   | 1.0 (ref)                         |
| Any contact                                                  | 1.1 (0.9-1.3)                     |
| Unknown                                                      | 1.3 (0.9-1.9)                     |
| Month of test                                                |                                   |
| April                                                        | 1.0 (ref)                         |
| May                                                          | 1.1 (0.8-1.4)                     |
| June                                                         | 1.1 (0.8-1.7)                     |
| July                                                         | 1.1 (0.7-1.7)                     |
| August                                                       | 1.0 (0.6-1.8)                     |

<sup>a</sup> Odds ratio for the relationship between the specified factor and SARS-CoV-2 seropositivity using mixed effects logistic regression controlling for all other factors in the table and adjusting for correlation within each healthcare system (via inclusion of a random intercept)

<sup>b</sup> Other direct care provider = Dialysis technician, phlebotomist

<sup>c</sup> Other provider = Laboratory technician, student, medical technologist, other categories unable to refine

OR= odds ratio; CI = confidence interval; ref = reference group, NA = not applicable due to small sample size

**eTable 4. Results of Logistic Regression Analyses Excluding the Random Intercept Component, With SARS-CoV-2 Serology as the Outcome Variable**

| Factor                                                          | Adjusted OR <sup>a</sup> (95% CI) |
|-----------------------------------------------------------------|-----------------------------------|
| Total participants                                              | 23,548                            |
| <b>Demographic &amp; community factors</b>                      |                                   |
| Sex                                                             |                                   |
| Male                                                            | 1.0 (ref)                         |
| Female                                                          | 0.8 (0.7-1.0)                     |
| Other/unknown                                                   | 0.0 (NA-9.3)                      |
| Age group                                                       |                                   |
| 60+                                                             | 1.0 (ref)                         |
| 50-59                                                           | 0.9 (0.7-1.2)                     |
| 40-49                                                           | 1.0 (0.8-1.3)                     |
| 30-39                                                           | 1.1 (0.9-1.4)                     |
| <30                                                             | 1.3 (1.0-1.7)                     |
| Ethnicity                                                       |                                   |
| Not Hispanic/Latino                                             | 1.0 (ref)                         |
| Hispanic/Latino                                                 | 1.2 (0.9-1.6)                     |
| Unknown                                                         | 0.7 (0.5-1.1)                     |
| Race                                                            |                                   |
| White                                                           | 1.0 (ref)                         |
| American Indian/Alaska Native                                   | 1.3 (0.5-3.0)                     |
| Asian                                                           | 1.3 (1.0-1.6)                     |
| Black/African American                                          | 2.2 (1.9-2.6)                     |
| Multiracial                                                     | 1.5 (0.8-2.5)                     |
| Native Hawaiian/Other Pacific Islander                          | 0.8 (0.0-4.0)                     |
| Other                                                           | 1.1 (0.7-1.6)                     |
| Unknown                                                         | 1.9 (1.2-2.8)                     |
| Contact with COVID-19 positive person in community              |                                   |
| No                                                              | 1.0 (ref)                         |
| Yes                                                             | 3.7 (3.1-4.3)                     |
| Unknown                                                         | 1.5 (1.2-1.8)                     |
| Cumulative incidence of COVID-19 (log 10) per 10,000 population | 1.1 (0.8-1.4)                     |

**eTable 4. Results of Logistic Regression Analyses Excluding the Random Intercept Component, With SARS-CoV-2 Serology as the Outcome Variable (continued)**

| Factor                                                       | Adjusted OR <sup>a</sup> (95% CI) |
|--------------------------------------------------------------|-----------------------------------|
| <b>Workplace factors</b>                                     |                                   |
| Job role                                                     |                                   |
| Non-clinical                                                 | 1.0 (ref)                         |
| Advanced practice provider                                   | 0.9 (0.7-1.3)                     |
| Environmental services                                       | 1.5 (0.7-2.9)                     |
| Nurse                                                        | 1.1 (0.9-1.4)                     |
| Other direct care provider <sup>b</sup>                      | 1.2 (0.9-1.6)                     |
| Other provider <sup>c</sup>                                  | 0.8 (0.4-1.4)                     |
| Patient care technician, nursing assistant, nurse technician | 1.1 (0.8-1.5)                     |
| Pharmacy                                                     | 0.7 (0.3-1.4)                     |
| Physician                                                    | 0.9 (0.7-1.2)                     |
| Physical/Occupational/Speech therapist                       | 1.2 (0.7-1.9)                     |
| Radiology technician, x-ray, radiology                       | 1.1 (0.7-1.7)                     |
| Respiratory therapist                                        | 0.9 (0.5-1.5)                     |
| Unknown                                                      | 1.0 (0.5-2.0)                     |
| Workplace environment                                        |                                   |
| Inpatient (COVID-19/non-COVID-19)                            | 1.0 (ref)                         |
| Emergency department/emergency                               | 1.0 (0.8-1.3)                     |
| Other                                                        | 0.8 (0.7-1.0)                     |
| Unknown                                                      | 1.0 (0.7-1.3)                     |
| COVID-19 patient contact                                     |                                   |
| No contact                                                   | 1.0 (ref)                         |
| Any contact                                                  | 1.0 (0.9-1.2)                     |
| Unknown                                                      | 1.2 (0.8-1.7)                     |

<sup>a</sup> Odds ratio for the relationship between the specified factor and SARS-CoV-2 seropositivity using mixed effects logistic regression controlling for all other factors in the table and adjusting for correlation within each healthcare system (via inclusion of a random intercept)

<sup>b</sup> Other direct care provider = Dialysis technician, phlebotomist

<sup>c</sup> Other provider = Laboratory technician, student, medical technologist, other categories unable to refine

OR= odds ratio; CI = confidence interval; ref = reference group, NA = not applicable due to small sample size

Chi-square p-value from a likelihood ratio test comparing model fit for the random effects and fixed effect model was <0.001 indicating that the random intercept improved model fit.

**eTable 5. Infection Prevention Practices for Health Care Personnel (HCP) at the 4 Participating Health Care Systems Before (Cells Shaded Yellow) and During or After (Cells Shaded Blue) the Start of Seroprevalence Testing in HCP at That Site**

Serology start date varied by site, and the earliest started the week of 4/19/2020

| Site                   | Enhanced hand hygiene, use of gowns, gloves for routine care of known or suspected COVID-19 patients | N95 or other respirator for routine care of known or suspected COVID-19 patients | N95 or other respirator for aerosol-generating procedure | Required universal masking of HCP | Required universal eye protection of HCP for patient encounters | Universal testing for patients on admission regardless of symptoms |
|------------------------|------------------------------------------------------------------------------------------------------|----------------------------------------------------------------------------------|----------------------------------------------------------|-----------------------------------|-----------------------------------------------------------------|--------------------------------------------------------------------|
| Emory                  | Prior to 4/2020                                                                                      | Prior to 4/2020 <sup>a</sup>                                                     | Prior to 4/2020                                          | 4/17/2020 <sup>b</sup>            | 7/24/2020                                                       | 5/3/2020                                                           |
| Johns Hopkins          | Prior to 4/2020                                                                                      | Prior to 4/2020                                                                  | Prior to 4/2020                                          | 4/3/2020                          | 4/23/2020                                                       | 5/13/2020                                                          |
| Rush                   | Prior to 4/2020                                                                                      | Prior to 4/2020 <sup>c</sup>                                                     | Prior to 4/2020                                          | 3/27/2020                         | 11/9/2020                                                       | N/A                                                                |
| University of Maryland | Prior to 4/2020                                                                                      | Prior to 4/2020                                                                  | Prior to 4/2020                                          | 4/1/2020                          | 4/1/2020                                                        | 5/6/2020                                                           |

<sup>a</sup> Due to contemporary public health guidance and uncertain respirator availability, procedure masks were recommended 3/20/20 to 4/1/2020.

<sup>b</sup> Available and suggested, but not required, starting 3/31/2020.

<sup>c</sup> Due to contemporary public health guidance and uncertain respirator availability, procedure masks were recommended 3/20/20 to 4/8/2020 and either a respirator or procedure mask was recommended after 4/9/2020.
